# Supplementary material for: Efficacy and safety of a 3D-printed arthrodesis prosthesis for reconstruction after resection of the proximal humerus: preliminary outcomes with a minimum 2-year follow-up
Source: BMC Musculoskelet Disord. 2022 Jul 4;23:635. doi: 10.1186/s12891-022-05581-6 (PMC9251937; doi:10.1186/s12891-022-05581-6)
Supplement: Supplementary file 2 — Additional file 2: Supplemental file 2. Raw data of the eleven patients who underwent replacement of a 3D-printed arthrodesis prosthesis after resection of the proximal humerus. [file 12891_2022_5581_MOESM2_ESM.xlsx]

## Sheet: title and legend.
Supplemental file 2:
Raw data of the eleven patients who underwent replacement of a 3D-printed arthrodesis prosthesis after resection of the proximal humerus.

## Sheet: raw data
ID	age	gender	Height(cm)	weight(kg)	BMI	side	onsettime(month)	pathology	stage	diameter	pathological fracture	lungmeta	LNmeta	Neoadjuvantchemo	ratioofresection	axillarynerve	Followup(month)	Survival	Recurrence	LRtime	Metastasis	Metatime	complication	MSTS93%	ASEStotal	MSTS93	forwardelevation°	abduction°	Opduration（min）	Opbleeding(ml)	hospitalization(d)
4291388	19	male	183	79	23.5898	R	2	osteosarcoma	localized	118	1	0	0	0	0.548387	no	16.2628	dead	0		1	1.64271	no						315	1000	7
4344051	52	male	168	75	26.5731	R	3	chondrosarcoma	localized	67	0	0	0	0	0.261486	no	24.9363	alive	1	14.9487	1	24.9363	no						130	200	4
4360494	61	male	174	70	23.1206	R	48	chondrosarcoma	localized	57.6	0	0	0	0	0.230278	preserved	24.9692	alive	0		0		no	83.33	77	25	80	60	115	50	4
4349177	14	male	167	80	28.6851	R	3	osteosarcoma	localized	45.7	1	0	0	0	0.383803	preserved	25	alive	0		1	22.1766	no	90	96.6667	27	90	90	135	100	4
4295771	30	male	177	70	22.3435	R	5	malignant myoepithelioma	localized	58	0	0	0	0	0.419048	no	31.1786	dead	0		1	19.154	no	90	81.6667	27	90	70	120	50	5
4327196	43	male	170	76	26.2976	R	14	UPS‎	metastasis	53	1	1	1	1	0.406061	preserved	31.54	alive	0		0		no	83.3333	83.33	27	90	75	170	800	6
5076895	12	male	153	55	23.4952	R	3	osteosarcoma	localized	36	0	0	0	1	0.469055	no	32.2957	alive	0		0		no	86.6667	78.3333	26	60	60	120	200	3
4324521	26	female	160	63.5	24.8047	L	8	osteosarcoma	localized	59	0	0	0	1	0.423077	no	32.6571	alive	1	25.692	0		structure failure	66.6667	71.6667	20	45	45	120	700	4
4315255	44	male	168	67	23.7387	R	18	chondrosarcoma	metastasis	68	0	0	1	0	0.503289	no	35.9754	alive	0		0		no	90	76.6667	27	70	45	170	700	7
5074375	20	male	178	64	20.1995	R	4	osteosarcoma	localized	90	0	0	0	0	0.387097	preserved	37.8152	alive	0		0		structure failure	66.6667	70	20	45	45	120	300	9
